# Supplementary material
Source: bioRxiv or medRxiv preprint supplement (http://medrxiv.org/highwire/filestream/81545/field_highwire_adjunct_files/0/2020.05.13.20100495-1.pdf)
Supplement: Supplementary file [file 2020.05.13.20100495-1.pdf]

**Supplementary Table 1.** Descriptive characteristics of eligible articles examining prognostic factors for adverse health outcomes in patients with Coronavirus-2019 disease.

| Reference                 | Country | Region    | City (Hospital)                                      | Recruitment period            | Sample size | Outcomes             |
|---------------------------|---------|-----------|------------------------------------------------------|-------------------------------|-------------|----------------------|
| Cai, 2020 <sup>1</sup>    | China   | Guangdong | Shenzhen (Third People's Hospital of Shenzhen)       | Jan 11 to Feb 6, 2020         | 298         | Severity of COVID-19 |
| Cao, 2020 <sup>2</sup>    | China   | Hubei     | Wuhan (Zhongnan Hospital)                            | Jan 3 to Feb 1, 2020          | 102         | Mortality            |
| Caruso, 2020 <sup>3</sup> | Italy   | Rome      | Rome (Sant' Andrea Hospital)                         | March 4 to March 19, 2020     | 58          | Severity of COVID-19 |
| Chen, 2020 <sup>4</sup>   | China   | Hubei     | Wuhan (Tongji Hospital)                              | Late Dec 2019 to Jan 27, 2020 | 21          | Severity of COVID-19 |
| Chen, 2020 <sup>5</sup>   | China   | Hubei     | Wuhan (Tongji Hospital)                              | Jan 13 to Feb 12, 2020        | 274         | Mortality            |
| Chen, 2020 <sup>6</sup>   | China   | Shanghai  | Shanghai (Shanghai Public Health Clinical Center)    | Jan 20 to Feb 6, 2020         | 249         | ICU admission        |
| Chen, 2020 <sup>7</sup>   | China   | Hubei     | Wuhan (Zhongnan Hospital)                            | Jan 1 to Feb 10, 2020         | 203         | Mortality            |
| Chen, 2020 <sup>8</sup>   | China   | Hubei     | Wuhan (General Hospital of People's Liberation Army) | Feb 1 to Feb 19, 2020         | 48          | Severity of COVID-19 |

| Reference                   | Country   | Region                 | City (Hospital)                                                                                                        | Recruitment period           | Sample size | Outcomes                                |
|-----------------------------|-----------|------------------------|------------------------------------------------------------------------------------------------------------------------|------------------------------|-------------|-----------------------------------------|
| Cheng, 2020 <sup>9</sup>    | China     | Hubei                  | Wuhan (Tongji Hospital)                                                                                                | Jan 28 to Feb 11, 2020       | 701         | Mortality                               |
| Chu, 2020 <sup>10</sup>     | China     | Hubei                  | Wuhan (Tongji Hospital)                                                                                                | Jan 7 to Feb 11, 2020        | 54          | Severity of COVID-19                    |
| Colombi, 2020 <sup>11</sup> | Italy     | Emilia-Romagna         | Piacenza (“Guglielmo da Saliceto” Hospital)                                                                            | Feb 17 to Mar 10, 2020       | 236         | Composite outcome                       |
| Deng, 2020 <sup>12</sup>    | China     | Hubei                  | Wuhan (RenMin Hospital)                                                                                                | Jan 6 to Feb 20, 2020        | 112         | Severity of COVID-19, Composite outcome |
| Du, 2020 <sup>13</sup>      | China     | Hubei                  | Wuhan (Wuhan Pulmonary Hospital)                                                                                       | Dec 25, 2019 to Feb 7, 2020  | 179         | Mortality                               |
| Du, 2020 <sup>14</sup>      | China     | Hubei                  | Wuhan (Pulmonary Hospital of Wuhan, Tianyou Hospital, Central Hospital of Wuhan)                                       | Dec 25, 2019 to Feb 15, 2020 | 109         | ICU admission                           |
| Fan, 2020 <sup>15</sup>     | Singapore | Singapore              | Singapore                                                                                                              | NR                           | 67          | ICU admission                           |
| Fang, 2020 <sup>16</sup>    | China     | Anhui                  | Hefei (Anhui Provincial Hospital)                                                                                      | Jan 22 to Mar 1, 2020        | 78          | Severity of COVID-19                    |
| Feng, 2020 <sup>17</sup>    | China     | Hubei, Shanghai, Anhui | Wuhan (Jin Yin-tan Hospital), Shanghai (Shanghai Public Health Clinical Center), Tongling (Tongling People's Hospital) | Jan 1 to Feb 15, 2020        | 476         | Severity of COVID-19, Mortality         |

| <b>Reference</b>          | <b>Country</b> | <b>Region</b>    | <b>City (Hospital)</b>                                                                                                         | <b>Recruitment period</b>    | <b>Sample size</b> | <b>Outcomes</b>                                                                           |
|---------------------------|----------------|------------------|--------------------------------------------------------------------------------------------------------------------------------|------------------------------|--------------------|-------------------------------------------------------------------------------------------|
| Gao, 2020 <sup>18</sup>   | China          | Anhui            | Fuyang (Second People's Hospital of Fuyang)                                                                                    | Jan 23 to Feb 2, 2020        | 43                 | Severity of COVID-19                                                                      |
| Gao, 2020 <sup>19</sup>   | China          | Hubei            | Wuhan (RenMin Hospital)                                                                                                        | NR                           | 54                 | Mortality                                                                                 |
| Gong, 2020 <sup>20</sup>  | China          | Guangdong, Hubei | Guangzhou (Guangzhou Eighth People's Hospital, Third Affiliated Hospital of Sun Yat-sen University), Wuhan (Zhongnan Hospital) | Jan 20 to Mar 2, 2020        | 189                | Severity of COVID-19                                                                      |
| Goyal, 2020 <sup>21</sup> | USA            | New York         | New York                                                                                                                       | Mar 3 to Mar 27, 2020        | 393                | Need for mechanical ventilation                                                           |
| Guan, 2020 <sup>22</sup>  | China          | Nation-wide      | Nation-wide                                                                                                                    | Dec 11, 2019 to Jan 29, 2020 | 1099               | Severity of COVID-19, Composite outcome                                                   |
| Guan, 2020 <sup>23</sup>  | China          | Nation-wide      | Nation-wide                                                                                                                    | Dec 11, 2019 to Jan 31, 2020 | 1590               | Mortality, Severity of COVID-19, ICU admission, Mechanical ventilation, Composite outcome |

| Reference                 | Country   | Region         | City (Hospital)                                                                                             | Recruitment period          | Sample size | Outcomes               |
|---------------------------|-----------|----------------|-------------------------------------------------------------------------------------------------------------|-----------------------------|-------------|------------------------|
| Guo, 2020 <sup>24</sup>   | China     | Hubei          | Wuhan (Union Hospital)                                                                                      | Feb 10 to Feb 29, 2020      | 174         | Mortality              |
| Guo, 2020 <sup>25</sup>   | China     | Hubei          | Wuhan (Seventh Hospital of Wuhan)                                                                           | Jan 23 to Feb 23, 2020      | 187         | Mortality              |
| Han, 2020 <sup>26</sup>   | China     | Hubei          | Wuhan (RenMin Hospital)                                                                                     | Jan 1 to Feb 18, 2020       | 273         | Severity of COVID-19   |
| Huang, 2020 <sup>27</sup> | China     | Hubei          | Wuhan (Jin Yin-tan Hospital)                                                                                | Dec 31, 2019 to Jan 2, 2020 | 41          | ICU admission          |
| Ji, 2020 <sup>28</sup>    | China     | Anhui, Beijing | Fuyang (Second People's Hospital of Fuyang), Beijing (Fifth Medical Center of Chinese PLA General hospital) | Jan 20 to Feb 18, 2020      | 202         | Progression of disease |
| Ji, 2020 <sup>29</sup>    | China     | Anhui, Beijing | Fuyang (Second People's Hospital of Fuyang), Beijing (Fifth Medical Center of Chinese PLA General hospital) | Jan 20 to Feb 22, 2020      | 208         | Progression of disease |
| Jin, 2020 <sup>30</sup>   | China     | Zhejiang       | NR                                                                                                          | Jan 17 to Feb 8, 2020       | 651         | Severity of COVID-19   |
| To, 2020 <sup>31</sup>    | Hong Kong | Hong Kong      | Hong Kong (Princess Margaret Hospital, Queen Mary Hospital)                                                 | NR                          | 23          | Composite outcome      |
| Li, 2020 <sup>32</sup>    | China     | Hubei          | Wuhan (Tianyou Hospital of Wuhan)                                                                           | Jan 18 to Feb 26, 2020      | 132         | Severity of COVID-19   |

| <b>Reference</b>            | <b>Country</b> | <b>Region</b>       | <b>City (Hospital)</b>                     | <b>Recruitment period</b>    | <b>Sample size</b> | <b>Outcomes</b>                   |
|-----------------------------|----------------|---------------------|--------------------------------------------|------------------------------|--------------------|-----------------------------------|
| Li, 2020 <sup>33</sup>      | China          | Hubei               | Wuhan (Tongji Hospital)                    | Jan 1 to Feb 20, 2020        | 25                 | Mortality, Severity of COVID-19   |
| Li, 2020 <sup>34</sup>      | China          | Chongqing, Shandong | Chongqing, Jinan                           | Jan to Feb 2020              | 83                 | Severity of COVID-19              |
| Li, 2020 <sup>35</sup>      | China          | Hubei               | Wuhan (Tongji Hospital)                    | Jan 26 to Feb 5, 2020        | 548                | Mortality, Severity of COVID-19   |
| Li, 2020 <sup>36</sup>      | China          | Hubei               | Hanchuan (Hanchuan City People's Hospital) | Jan 20 to Feb 14, 2020       | 225                | Severity of COVID-19              |
| Lian, 2020 <sup>37</sup>    | China          | Zhejiang            | NR                                         | Jan 17 to Feb 12, 2020       | 788                | Severity of COVID-19              |
| Lighter, 2020 <sup>38</sup> | USA            | New York            | New York                                   | March 4 to April 4, 2020     | 3615               | Hospital admission, ICU admission |
| Liu, 2020 <sup>39</sup>     | China          | Anhui               | Hefei, Bozhou, Tongling, Fuyang            | Jan 21 to Feb 3, 2020        | 73                 | Severity of COVID-19              |
| Liu, 2020 <sup>40</sup>     | China          | Hubei               | Wuhan                                      | Dec 30, 2019 to Jan 15, 2020 | 78                 | Progression of disease            |
| Liu, 2020 <sup>41</sup>     | China          | Hubei               | Wuhan (Zhongnan Hospital)                  | Jan 1 to Feb 29, 2020        | 245                | Mortality                         |
| Liu, 2020 <sup>42</sup>     | China          | Hubei               | Wuhan (Central Hospital of Wuhan)          | Jan 2 to Mar 1, 2020         | 383                | Mortality                         |

| Reference                 | Country | Region   | City (Hospital)                                                                                                                                       | Recruitment period     | Sample size | Outcomes                          |
|---------------------------|---------|----------|-------------------------------------------------------------------------------------------------------------------------------------------------------|------------------------|-------------|-----------------------------------|
| Liu, 2020 <sup>43</sup>   | China   | Hubei    | Wuhan (RenMin Hospital)                                                                                                                               | Jan 31 to Feb 26, 2020 | 119         | Severity of COVID-19              |
| Lyu, 2020 <sup>44</sup>   | China   | Henan    | Zhengzhou (First Affiliated Hospital of Zhengzhou)                                                                                                    | Jan 15 to Feb 24, 2020 | 51          | Severity of COVID-19              |
| Mao, 2020 <sup>45</sup>   | China   | Hubei    | Wuhan (Union Hospital)                                                                                                                                | Jan 16 to Feb 19, 2020 | 214         | Severity of COVID-19              |
| Meng, 2020 <sup>46</sup>  | China   | Hubei    | Wuhan (RenMin Hospital)                                                                                                                               | Jan 1 to Feb 23, 2020  | 58          | Progression of disease            |
| Mo, 2020 <sup>47</sup>    | China   | Hubei    | Wuhan (Zhongnan Hospital)                                                                                                                             | Jan 1 to Feb 5, 2020   | 155         | Progression of disease            |
| Nobel, 2020 <sup>48</sup> | USA     | New York | New York                                                                                                                                              | Mar 10 to Mar 21, 2020 | 278         | Hospital admission, ICU admission |
| Pan, 2020 <sup>49</sup>   | China   | Hubei    | Wuhan (Hanan Hospital, Union Hospital), Huanggang (Huanggang Central Hospital)                                                                        | Jan 18 to Feb 28, 2020 | 103         | Severity of COVID-19              |
| Qin, 2020 <sup>50</sup>   | China   | Hubei    | Wuhan (Tongji Hospital)                                                                                                                               | Jan 10 to Feb 12, 2020 | 452         | Severity of COVID-19              |
| Qiu, 2020 <sup>51</sup>   | China   | Zhejiang | Ningbo (Ningbo Women and Children's Hospital), Wenzhou (Third Affiliated Hospital of Wenzhou Medical University, Wenzhou Central Hospital of Wenzhou) | NR                     | 36          | Severity of COVID-19              |

| Reference                    | Country | Region   | City (Hospital)                                                                                                                                                                                                                                                                                               | Recruitment period     | Sample size | Outcomes                        |
|------------------------------|---------|----------|---------------------------------------------------------------------------------------------------------------------------------------------------------------------------------------------------------------------------------------------------------------------------------------------------------------|------------------------|-------------|---------------------------------|
| Shen, 2020 <sup>52</sup>     | China   | Hubei    | Xiangyang (Xiangyang Central Hospital)                                                                                                                                                                                                                                                                        | Jan to Feb 2020        | 119         | ICU admission                   |
| Shen, 2020 <sup>53</sup>     | China   | Shaanxi  | NR                                                                                                                                                                                                                                                                                                            | Jan 22 to Feb 7, 2020  | 44          | Severity of COVID-19            |
| Shi, 2020 <sup>54</sup>      | China   | Zhejiang | NR                                                                                                                                                                                                                                                                                                            | NR                     | 487         | Severity of COVID-19            |
| Shi, 2020 <sup>55</sup>      | China   | Hubei    | Wuhan (RenMin Hospital)                                                                                                                                                                                                                                                                                       | Jan 20 to Feb 10, 2020 | 416         | Mortality                       |
| Simonnet, 2020 <sup>56</sup> | France  | Lille    | Lille (Roger Salengro Hospital)                                                                                                                                                                                                                                                                               | Feb 27 to Apr 5, 2020  | 124         | Need for mechanical ventilation |
| Tang, 2020 <sup>57</sup>     | China   | Hubei    | Wuhan (Tongji Hospital)                                                                                                                                                                                                                                                                                       | Jan 1 to Feb 13, 2020  | 449         | Mortality                       |
| Tian, 2020 <sup>58</sup>     | China   | Beijing  | Beijing (Beijing Emergency Medical Center, Beijing Chao Yang District Emergency Medical Center, Beijing Haidian District Medical Rescue Center, Beijing Luhe Hospital, Beijing Dongcheng District Emergency Medical Center, Beijing Shijingshan District Hospital, Beijing Daxing District People's Hospital) | Jan 20 to Feb 10, 2020 | 262         | Severity of COVID-19            |

| Reference                | Country | Region         | City (Hospital)                                                                                                                                                                          | Recruitment period           | Sample size | Outcomes             |
|--------------------------|---------|----------------|------------------------------------------------------------------------------------------------------------------------------------------------------------------------------------------|------------------------------|-------------|----------------------|
| Wan, 2020 <sup>59</sup>  | China   | Chongqing      | Chongqing (Three Gorges Hospital)                                                                                                                                                        | Jan 23 to Feb 8, 2020        | 135         | Severity of COVID-19 |
| Wang, 2020 <sup>60</sup> | China   | Hubei          | Wuhan (Tongji Hospital)                                                                                                                                                                  | Jan 25 to Feb 25, 2020       | 344         | Mortality            |
| Wang, 2020 <sup>61</sup> | China   | Hubei          | Wuhan (RenMin Hospital)                                                                                                                                                                  | Jan 1 to Feb 6, 2020         | 339         | Mortality            |
| Wang, 2020 <sup>62</sup> | China   | Guangdong      | Shenzhen (Third People's Hospital of Shenzhen)                                                                                                                                           | Jan 11 to Feb 29, 2020       | 55          | Severity of COVID-19 |
| Wang, 2020 <sup>63</sup> | China   | Hubei          | Wuhan (Union Hospital)                                                                                                                                                                   | Jan 16 to Jan 29, 2020       | 67          | Low SpO <sub>2</sub> |
| Wang, 2020 <sup>64</sup> | China   | Hubei          | Wuhan (Zhongnan Hospital)                                                                                                                                                                | NR                           | 138         | ICU admission        |
| Wang, 2020 <sup>65</sup> | China   | Hubei          | Wuhan (RenMin Hospital)                                                                                                                                                                  | Jan 14 to Feb 13, 2020       | 116         | Severity of COVID-19 |
| Wu, 2020 <sup>66</sup>   | China   | Jiangsu, Anhui | Yancheng (First People's Hospital of Yancheng City, Second People's Hospital of Yancheng City), Fuyang (Second People's Hospital of Fuyang City), Wuxi (Fifth People's Hospital of Wuxi) | Jan 20 to Feb 19, 2020       | 280         | Severity of COVID-19 |
| Wu, 2020 <sup>67</sup>   | China   | Hubei          | Wuhan (Jin Yin-tan Hospital)                                                                                                                                                             | Dec 25, 2019 to Jan 26, 2020 | 201         | ARDS                 |

| Reference                 | Country   | Region            | City (Hospital)                                                                                    | Recruitment period            | Sample size | Outcomes                     |
|---------------------------|-----------|-------------------|----------------------------------------------------------------------------------------------------|-------------------------------|-------------|------------------------------|
| Xie, 2020 <sup>68</sup>   | China     | Hubei             | Wuhan (Jin Yin-tan Hospital)                                                                       | Feb 2 to Feb 23, 2020         | 79          | Severity of COVID-19         |
| Xu, 2020 <sup>69</sup>    | China     | Hebei             | Baoding (Affiliated Hospital of Hebei University, Baoding City People's Hospital)                  | Jan to Feb 2020               | 50          | Severity of COVID-19         |
| Yang, 2020 <sup>70</sup>  | China     | Shanghai          | Shanghai (Shanghai Public Health Clinical Center)                                                  | NR                            | 273         | Progression of disease       |
| Yang, 2020 <sup>71</sup>  | China     | Hubei             | Wuhan (Jin Yin-tan Hospital)                                                                       | Dec 24, 2019 to Jan 26, 2020  | 52          | Mortality                    |
| Yang, 2020 <sup>72</sup>  | China     | Hubei             | Wuhan (Jin-Yin-tan Hospital)                                                                       | Late Dec 2019 to Feb 25, 2020 | 1476        | Mortality                    |
| Yang, 2020 <sup>73</sup>  | China     | Zhejiang, Jiangxi | Hangzhou (Zhejiang Xiaoshan Hospital), Nanchang (First Affiliated Hospital of Nanchang University) | NR                            | 93          | Severity of COVID-19         |
| Young, 2020 <sup>74</sup> | Singapore | Singapore         | NR                                                                                                 | Jan 23 to Feb 3, 2020         | 18          | Need for supplemental oxygen |
| Yuan, 2020 <sup>75</sup>  | China     | Guangdong         | Shenzhen (Third People's Hospital of Shenzhen)                                                     | Jan 11 to Feb 4, 2020         | 94          | Severity of COVID-19         |
| Yuan, 2020 <sup>76</sup>  | China     | Hubei             | Wuhan (Central Hospital of Wuhan)                                                                  | Jan 1 to Jan 25, 2020         | 27          | Mortality                    |

| Reference                 | Country | Region   | City (Hospital)                                               | Recruitment period     | Sample size | Outcomes                                                |
|---------------------------|---------|----------|---------------------------------------------------------------|------------------------|-------------|---------------------------------------------------------|
| Zhao, 2020 <sup>77</sup>  | China   | Hunan    | Changsa (Second Xiangya Hospital, First Hospital of Changsha) | Jan 16 to Feb 4, 2020  | 118         | Progression of disease                                  |
| Zhang, 2020 <sup>78</sup> | China   | Hubei    | Wuhan (Xinzhou District People's Hospital)                    | Jan 16 to Feb 25, 2020 | 95          | Severity of COVID-19, Composite outcome                 |
| Zhang, 2020 <sup>79</sup> | China   | Hubei    | Wuhan (Zhongnan Hospital)                                     | Jan 18 to Feb 22, 2020 | 115         | Severity of COVID-19                                    |
| Zhang, 2020 <sup>80</sup> | China   | Hubei    | Wuhan (Seventh Hospital of Wuhan)                             | Jan 16 to Feb 3, 2020  | 140         | Severity of COVID-19                                    |
| Zhang, 2020 <sup>81</sup> | China   | Zhejiang | NR                                                            | Jan 17 to Feb 8, 2020  | 645         | Severity of COVID-19                                    |
| Zhang, 2020 <sup>82</sup> | China   | Hubei    | Wuhan (RenMin Hospital)                                       | Jan 11 to Feb 6, 2020  | 663         | Severity of COVID-19, Mortality, Progression of disease |
| Zhang, 2020 <sup>83</sup> | China   | Hubei    | Wuhan (RenMin Hospital)                                       | Jan 10 to Feb 10, 2020 | 120         | Severity of COVID-19                                    |
| Zhao, 2020 <sup>84</sup>  | China   | Hunan    | Changsha, Yueyang, Changde, Xiang-Tan                         | NR                     | 101         | Severity of COVID-19                                    |

| <b>Reference</b>          | <b>Country</b> | <b>Region</b> | <b>City (Hospital)</b>                                    | <b>Recruitment period</b>    | <b>Sample size</b> | <b>Outcomes</b>        |
|---------------------------|----------------|---------------|-----------------------------------------------------------|------------------------------|--------------------|------------------------|
| Zheng, 2020 <sup>85</sup> | China          | Hunan         | Changsha (North Hospital of Changsha)                     | Jan 17 to Feb 7, 2020        | 161                | Severity of COVID-19   |
| Zhou, 2020 <sup>86</sup>  | China          | Jiangxi       | Nanchang (Ninth Hospital of Nanchang)                     | Jan 28 to Feb 6, 2020        | 17                 | Progression of disease |
| Zhou, 2020 <sup>87</sup>  | China          | Hubei         | Wuhan (Jin Yin-tan Hospital, Pulmonary Hospital of Wuhan) | Dec 29, 2019 to Jan 31, 2020 | 191                | Mortality              |
| Zhou, 2020 <sup>88</sup>  | China          | Hubei         | Wuhan (Central Hospital of Wuhan)                         | Dec 20, 2019 to Feb 9, 2020  | 254                | Mortality              |

**Supplementary Table 2.** Meta-analyses of observational studies for risk factors of adverse clinical outcomes in patients with COVID-19 that were examined in 2 independent studies.

| <b>Risk factor</b>                | <b>Level of comparison</b> | <b>N cases/N participants</b> | <b>N studies</b> | <b>Random-effects summary OR (95% CI)</b> | <b>P-value</b> | <b>I<sup>2</sup></b> |
|-----------------------------------|----------------------------|-------------------------------|------------------|-------------------------------------------|----------------|----------------------|
| <i>ICU admission (Yes vs. No)</i> |                            |                               |                  |                                           |                |                      |
| Age                               | >65 vs. <65                | 71/228                        | 2                | 2.81 (0.26 - 31.02)                       | 0.398          | 92                   |
| Albumin                           | Decreased vs. Normal       | 73/358                        | 2                | 1.75 (0.76 - 4.02)                        | 0.188          | 57                   |
| AST                               | Elevated vs. Normal        | 64/150                        | 2                | 2.15 (0.60 - 7.70)                        | 0.239          | 62                   |
| Bilateral lung involvement        | Yes vs. No                 | 49/179                        | 2                | 0.83 (0.07 - 10.20)                       | 0.881          | 0                    |
| COPD                              | Yes vs. No                 | 49/179                        | 2                | 8.33 (1.27 - 54.56)                       | 0.027          | 0                    |
| Creatinine                        | Elevated vs. Normal        | 64/150                        | 2                | 0.62 (0.05 - 7.03)                        | 0.697          | 71                   |
| Hemoptysis                        | Yes vs. No                 | 64/148                        | 2                | 3.23 (0.77 - 13.45)                       | 0.108          | 0                    |
| Highest temperature               | >39 vs. <39                | 64/150                        | 2                | 1.47 (0.09 - 23.69)                       | 0.788          | 65                   |
| LDH                               | Elevated vs. Normal        | 17/70                         | 2                | 12.12 (2.04 - 71.81)                      | 0.006          | 0                    |
| Myalgia                           | Yes vs. No                 | 87/247                        | 2                | 1.35 (0.57 - 3.23)                        | 0.495          | 45                   |
| Nausea and/or vomiting            | Yes vs. No                 | 64/397                        | 2                | 0.80 (0.37 - 1.73)                        | 0.563          | 0                    |
| Neutrophil count                  | Decreased vs. Normal       | 60/174                        | 2                | 0.35 (0.04 - 3.22)                        | 0.352          | 8                    |
| Pharyngalgia                      | Yes vs. No                 | 56/257                        | 2                | 1.66 (0.23 - 12.16)                       | 0.616          | 68                   |

| <b>Risk factor</b>                         | <b>Level of comparison</b> | <b>N cases/N participants</b> | <b>N studies</b> | <b>Random-effects summary OR (95% CI)</b> | <b>P-value</b>        | <b>I<sup>2</sup></b> |
|--------------------------------------------|----------------------------|-------------------------------|------------------|-------------------------------------------|-----------------------|----------------------|
| Respiratory rate                           | Elevated vs. Normal        | 64/150                        | 2                | 3.31 (0.52 - 21.02)                       | 0.205                 | 78                   |
| Troponin                                   | Elevated vs. Normal        | 64/150                        | 2                | 2.80 (0.29 - 27.41)                       | 0.376                 | 73                   |
| WBC                                        | >10 vs. <10                | 64/149                        | 2                | 2.18 (0.54 - 8.80)                        | 0.274                 | 65                   |
| <i>Progression of disease (Yes vs. No)</i> |                            |                               |                  |                                           |                       |                      |
| Abdominal pain                             | Yes vs. No                 | 497/818                       | 2                | 1.35 (0.29 - 6.37)                        | 0.701                 | 0                    |
| Age                                        | Per 1 unit increase        | 143/453                       | 2                | 1.05 (1.00 - 1.11)                        | 0.074                 | 81                   |
| ALT                                        | Elevated vs. Normal        | 451/865                       | 2                | 1.51 (0.66 - 3.49)                        | 0.331                 | 77                   |
| Any gastrointestinal disease               | Yes vs. No                 | 457/781                       | 2                | 1.60 (0.45 - 5.76)                        | 0.469                 | 35                   |
| Any respiratory disease                    | Yes vs. No                 | 457/781                       | 2                | 2.23 (1.18 - 4.24)                        | 0.014                 | 0                    |
| AST                                        | Elevated vs. Normal        | 451/865                       | 2                | 2.37 (1.65 - 3.39)                        | $2.5 \times 10^{-6}$  | 0                    |
| Cardiovascular disease                     | Yes vs. No                 | 497/818                       | 2                | 6.25 (1.10 - 35.45)                       | 0.039                 | 48                   |
| COPD                                       | Yes vs. No                 | 95/213                        | 2                | 10.53 (1.18 - 93.84)                      | 0.035                 | 0                    |
| Dizziness                                  | Yes vs. No                 | 497/818                       | 2                | 3.95 (1.26 - 12.39)                       | 0.019                 | 0                    |
| LDH                                        | Per 1 unit increase        | 90/172                        | 2                | 0.998 (0.994 - 1.002)                     | 0.306                 | 0                    |
| LDH                                        | Elevated vs. Normal        | 452/871                       | 2                | 4.79 (3.50 - 6.56)                        | $1.8 \times 10^{-22}$ | 0                    |
| Malignancy                                 | Yes vs. No                 | 497/818                       | 2                | 2.21 (0.80 - 6.13)                        | 0.127                 | 0                    |
| Myalgia                                    | Yes vs. No                 | 497/818                       | 2                | 0.40 (0.26 - 0.61)                        | $1.9 \times 10^{-5}$  | 1                    |

| <b>Risk factor</b>            | <b>Level of comparison</b> | <b>N cases/N participants</b> | <b>N studies</b> | <b>Random-effects summary OR (95% CI)</b> | <b>P-value</b>        | <b>I<sup>2</sup></b> |
|-------------------------------|----------------------------|-------------------------------|------------------|-------------------------------------------|-----------------------|----------------------|
| Nausea                        | Yes vs. No                 | 497/818                       | 2                | 0.82 (0.11 - 5.84)                        | 0.839                 | 49                   |
| Smoking status                | Ever vs. Never             | 125/363                       | 2                | 1.98 (0.82 - 4.82)                        | 0.131                 | 0                    |
| Urinary system disease        | Yes vs. No                 | 457/781                       | 2                | 4.23 (1.35 - 13.26)                       | 0.013                 | 0                    |
| Vomiting                      | Yes vs. No                 | 497/818                       | 2                | 1.28 (0.49 - 3.32)                        | 0.618                 | 0                    |
| <i>Mortality (Yes vs. No)</i> |                            |                               |                  |                                           |                       |                      |
| Age                           | >65 vs. <65                | 134/880                       | 2                | 4.37 (1.14 - 16.74)                       | 0.032                 | 80                   |
| ALT                           | Per 1 unit increase        | 98/584                        | 2                | 1.004 (0.997 - 1.012)                     | 0.230                 | 60                   |
| Altered consciousness         | Yes vs. No                 | 138/937                       | 2                | 19.27 (5.70 - 65.10)                      | $1.9 \times 10^{-6}$  | 8                    |
| Autoimmune disease            | Yes vs. No                 | 178/613                       | 2                | 1.19 (0.21 - 6.69)                        | 0.847                 | 0                    |
| Blood glucose                 | Elevated vs. Normal        | 51/107                        | 2                | 0.89 (0.39 - 2.05)                        | 0.788                 | 0                    |
| BUN                           | Elevated vs. Normal        | 130/802                       | 2                | 7.29 (5.09 - 10.43)                       | $1.9 \times 10^{-27}$ | 0                    |
| Chronic liver disease         | Yes vs. No                 | 98/584                        | 2                | 3.03 (0.72 - 12.74)                       | 0.131                 | 0                    |
| CK                            | Elevated vs. Normal        | 71/223                        | 2                | 2.09 (0.95 - 4.59)                        | 0.065                 | 0                    |
| Consolidation                 | Yes vs. No                 | 64/218                        | 2                | 3.26 (1.16 - 9.13)                        | 0.025                 | 20                   |
| CRP                           | Per 1 unit increase        | 98/584                        | 2                | 1.015 (1.011 - 1.020)                     | $1.5 \times 10^{-10}$ | 16                   |
| D-dimer                       | Per 1 unit increase        | 199/788                       | 2                | 1.03 (0.99 - 1.08)                        | 0.095                 | 86                   |
| Heart rate                    | Elevated vs. Normal        | 167/465                       | 2                | 2.79 (0.97 - 7.97)                        | 0.056                 | 17                   |
| Heart rate                    | Per 1 unit increase        | 98/584                        | 2                | 1.020 (1.003 - 1.036)                     | 0.018                 | 42                   |

| <b>Risk factor</b>                                             | <b>Level of comparison</b> | <b>N cases/N participants</b> | <b>N studies</b> | <b>Random-effects summary OR (95% CI)</b> | <b>P-value</b>         | <b>I<sup>2</sup></b> |
|----------------------------------------------------------------|----------------------------|-------------------------------|------------------|-------------------------------------------|------------------------|----------------------|
| Hemoglobin                                                     | Decreased vs. Normal       | 79/854                        | 2                | 1.66 (0.57 - 4.86)                        | 0.354                  | 70                   |
| Hemoptysis                                                     | Yes vs. No                 | 134/453                       | 2                | 1.23 (0.27 - 5.58)                        | 0.784                  | 12                   |
| Interleukin-6                                                  | Elevated vs. Normal        | 72/218                        | 2                | 5.39 (0.05 - 599.57)                      | 0.484                  | 90                   |
| Local patchy opacity/shadowing                                 | Yes vs. No                 | 132/416                       | 2                | 0.23 (0.07 - 0.83)                        | 0.025                  | 50                   |
| Nausea and vomiting                                            | Yes vs. No                 | 63/469                        | 2                | 0.79 (0.08 - 7.94)                        | 0.841                  | 54                   |
| PaO <sub>2</sub>                                               | Decreased vs. Normal       | 56/246                        | 2                | 11.62 (0.73 - 183.63)                     | 0.082                  | 72                   |
| PaO <sub>2</sub> /FiO <sub>2</sub>                             | Decreased vs. Normal       | 56/246                        | 2                | 10.92 (0.30 - 400.25)                     | 0.193                  | 83                   |
| Pharyngalgia                                                   | Yes vs. No                 | 178/613                       | 2                | 0.93 (0.38 - 2.27)                        | 0.867                  | 0                    |
| Platelet count                                                 | Per 1 unit increase        | 199/788                       | 2                | 0.995 (0.992 - 0.998)                     | 3.3 × 10 <sup>-4</sup> | 56                   |
| Pleural effusion                                               | Yes vs. No                 | 29/82                         | 2                | 0.75 (0.22 - 2.60)                        | 0.654                  | 0                    |
| SBP                                                            | <90 vs. >90                | 167/465                       | 2                | 3.77 (0.72 - 19.77)                       | 0.116                  | 15                   |
| SpO <sub>2</sub>                                               | Decreased vs. Normal       | 118/341                       | 2                | 17.72 (4.71 - 66.70)                      | 2.1 × 10 <sup>-5</sup> | 27                   |
| Tuberculosis                                                   | Yes vs. No                 | 40/234                        | 2                | 1.40 (0.10 - 18.93)                       | 0.800                  | 31                   |
| <i>Severity of disease (Severe/Critical vs. Mild/Moderate)</i> |                            |                               |                  |                                           |                        |                      |
| Any neurological disease                                       | Yes vs. No                 | 120/383                       | 2                | 2.22 (0.30 - 16.44)                       | 0.434                  | 6                    |
| Any neurological symptom                                       | Yes vs. No                 | 194/654                       | 2                | 1.51 (0.86 - 2.62)                        | 0.148                  | 36                   |
| Asthma                                                         | Yes vs. No                 | 271/603                       | 2                | 2.15 (0.44 - 10.59)                       | 0.345                  | 0                    |

| <b>Risk factor</b>                             | <b>Level of comparison</b> | <b>N cases/N participants</b> | <b>N studies</b> | <b>Random-effects summary OR (95% CI)</b> | <b>P-value</b>       | <b>I<sup>2</sup></b> |
|------------------------------------------------|----------------------------|-------------------------------|------------------|-------------------------------------------|----------------------|----------------------|
| Cardiovascular and/or cerebrovascular diseases | Yes vs. No                 | 171/494                       | 2                | 4.38 (0.42 - 45.96)                       | 0.218                | 93                   |
| Chest tightness                                | Yes vs. No                 | 589/1088                      | 2                | 1.78 (1.03 - 3.06)                        | 0.038                | 72                   |
| Chills                                         | Yes vs. No                 | 117/428                       | 2                | 1.71 (0.71 - 4.12)                        | 0.234                | 0                    |
| Fatty liver disease                            | Yes vs. No                 | 95/243                        | 2                | 1.24 (0.34 - 4.60)                        | 0.743                | 0                    |
| Globulin                                       | Elevated vs. Normal        | 296/655                       | 2                | 2.15 (1.56 - 2.97)                        | $3.5 \times 10^{-6}$ | 0                    |
| Highest temperature                            | >39 vs. <39                | 59/312                        | 2                | 1.16 (0.28 - 4.77)                        | 0.839                | 0                    |
| INR                                            | Elevated vs. Normal        | 95/760                        | 2                | 2.99 (0.42 - 21.28)                       | 0.274                | 66                   |
| Linear opacity                                 | Yes vs. No                 | 140/525                       | 2                | 3.35 (0.53 - 20.99)                       | 0.197                | 81                   |
| Mixed ground-glass opacity and consolidation   | Yes vs. No                 | 27/142                        | 2                | 1.53 (0.55 - 4.27)                        | 0.413                | 17                   |
| Neutrophil count                               | Decreased vs. Normal       | 292/625                       | 2                | 0.55 (0.12 - 2.56)                        | 0.444                | 64                   |
| Pleural thickening                             | Yes vs. No                 | 156/494                       | 2                | 1.04 (0.69 - 1.58)                        | 0.845                | 0                    |
| Proteinuria                                    | Yes vs. No                 | 189/449                       | 2                | 2.95 (1.95 - 4.46)                        | $3.0 \times 10^{-7}$ | 0                    |
| Respiratory rate                               | Elevated vs. Normal        | 51/156                        | 2                | 9.99 (2.87 - 34.84)                       | $3.0 \times 10^{-4}$ | 0                    |
| Retching/Belching                              | Yes vs. No                 | 97/274                        | 2                | 0.79 (0.20 - 3.09)                        | 0.738                | 0                    |
| Reticulation                                   | Yes vs. No                 | 39/184                        | 2                | 2.86 (1.01 - 8.14)                        | 0.049                | 0                    |
| Rhinorrhea                                     | Yes vs. No                 | 369/732                       | 2                | 1.73 (0.84 - 3.59)                        | 0.138                | 0                    |

| <b>Risk factor</b>                    | <b>Level of comparison</b> | <b>N cases/N participants</b> | <b>N studies</b> | <b>Random-effects summary OR (95% CI)</b> | <b>P-value</b>        | <b>I<sup>2</sup></b> |
|---------------------------------------|----------------------------|-------------------------------|------------------|-------------------------------------------|-----------------------|----------------------|
| SpO2                                  | Decreased vs. Normal       | 293/629                       | 2                | 15.67 (6.67 - 36.81)                      | $2.7 \times 10^{-10}$ | 48                   |
| Troponin                              | Elevated vs. Normal        | 84/298                        | 2                | 5.77 (2.57 - 12.92)                       | $2.1 \times 10^{-5}$  | 0                    |
| Tuberculosis                          | Yes vs. No                 | 327/688                       | 2                | 1.56 (0.22 - 10.88)                       | 0.652                 | 39                   |
| <i>Composite outcome (Yes vs. No)</i> |                            |                               |                  |                                           |                       |                      |
| Age                                   | >65 vs. <65                | 173/1247                      | 2                | 5.05 (2.93 - 8.68)                        | $5.0 \times 10^{-9}$  | 51                   |
| ALT                                   | Elevated vs. Normal        | 59/764                        | 2                | 1.45 (0.23 - 9.15)                        | 0.691                 | 60                   |
| Any comorbidity                       | Yes vs. No                 | 141/1613                      | 2                | 5.04 (3.51 - 7.24)                        | $1.8 \times 10^{-18}$ | 0                    |
| Chest pain                            | Yes vs. No                 | 41/135                        | 2                | 18.28 (1.43 - 234.51)                     | 0.026                 | 28                   |
| Chills                                | Yes vs. No                 | 77/1122                       | 2                | 1.08 (0.53 - 2.22)                        | 0.830                 | 0                    |
| Chronic respiratory disease           | Yes vs. No                 | 118/259                       | 2                | 1.63 (0.83 - 3.18)                        | 0.153                 | 0                    |
| Creatinine                            | Elevated vs. Normal        | 62/775                        | 2                | 5.83 (0.94 - 36.37)                       | 0.059                 | 40                   |
| Diarrhea                              | Yes vs. No                 | 77/1122                       | 2                | 1.95 (0.71 - 5.32)                        | 0.194                 | 0                    |
| Hypertension                          | Yes vs. No                 | 141/1613                      | 2                | 1.63 (1.11 - 2.38)                        | 0.012                 | 0                    |
| Malignancy                            | Yes vs. No                 | 239/1826                      | 2                | 3.53 (2.03 - 6.14)                        | $8.1 \times 10^{-6}$  | 0                    |
| Myalgia                               | Yes vs. No                 | 77/1122                       | 2                | 1.33 (0.11 - 15.80)                       | 0.822                 | 61                   |
| Nasal congestion                      | Yes vs. No                 | 77/1122                       | 2                | 0.56 (0.15 - 2.07)                        | 0.381                 | 0                    |
| Pharyngalgia                          | Yes vs. No                 | 77/1122                       | 2                | 0.81 (0.20 - 3.34)                        | 0.772                 | 22                   |
| Smoking status                        | Yes vs. No                 | 103/1166                      | 2                | 3.04 (1.91 - 4.84)                        | $3.0 \times 10^{-6}$  | 0                    |
| WBC                                   | <4 vs. >4                  | 68/1001                       | 2                | 0.45 (0.12 - 1.72)                        | 0.244                 | 42                   |

| <b>Risk factor</b>                                  | <b>Level of comparison</b> | <b>N cases/N participants</b> | <b>N studies</b> | <b>Random-effects summary OR (95% CI)</b> | <b>P-value</b> | <b>I<sup>2</sup></b> |
|-----------------------------------------------------|----------------------------|-------------------------------|------------------|-------------------------------------------|----------------|----------------------|
| <i>Invasive mechanical ventilation (Yes vs. No)</i> |                            |                               |                  |                                           |                |                      |
| Diabetes mellitus                                   | Yes vs. No                 | 215/517                       | 2                | 1.50 (0.78 - 2.85)                        | 0.221          | 35                   |
| Hypertension                                        | Yes vs. No                 | 215/517                       | 2                | 1.78 (0.78 - 4.03)                        | 0.169          | 70                   |
| Sex                                                 | Male vs. Female            | 215/517                       | 2                | 1.84 (1.24 - 2.73)                        | 0.003          | 0                    |

## Supplementary References

1. Cai Q, Huang D, Ou P, et al. COVID-19 in a designated infectious diseases hospital outside Hubei Province, China. *Allergy*. April 2020. doi:10.1111/all.14309
2. Cao J, Tu W-J, Cheng W, et al. Clinical Features and Short-term Outcomes of 102 Patients with Corona Virus Disease 2019 in Wuhan, China. *Clin Infect Dis*. April 2020. doi:10.1093/cid/ciaa243
3. Caruso D, Zerunian M, Polici M, et al. Chest CT Features of COVID-19 in Rome, Italy. *Radiology*. April 2020:201237. doi:10.1148/radiol.2020201237
4. Chen G, Wu D, Guo W, et al. Clinical and immunological features of severe and moderate coronavirus disease 2019. *J Clin Invest*. 2020;130(5):2620-2629. doi:10.1172/JCI137244
5. Chen T, Wu D, Chen H, et al. Clinical characteristics of 113 deceased patients with coronavirus disease 2019: retrospective study. *BMJ*. 2020;368:m1091. doi:10.1136/bmj.m1091
6. Chen J, Qi T, Liu L, et al. Clinical progression of patients with COVID-19 in Shanghai, China. *J Infect*. 2020;80(5):e1-e6. doi:10.1016/j.jinf.2020.03.004
7. Chen T, Dai Z, Mo P, et al. Clinical characteristics and outcomes of older patients with coronavirus disease 2019 (COVID-19) in Wuhan, China (2019): a single-centered, retrospective study. *Journals Gerontol Ser A*. April 2020. doi:10.1093/gerona/glaa089
8. Chen X, Zhao B, Qu Y, et al. Detectable serum SARS-CoV-2 viral load (RNAemia) is closely correlated with drastically elevated interleukin 6 (IL-6) level in critically ill COVID-19 patients. *Clin Infect Dis*. April 2020. doi:10.1093/cid/ciaa449
9. Cheng Y, Luo R, Wang K, et al. Kidney disease is associated with in-hospital death of patients with COVID-19. *Kidney Int*. 2020;97(5):829-838. doi:10.1016/j.kint.2020.03.005
10. Chu J, Yang N, Wei Y, et al. Clinical characteristics of 54 medical staff with COVID-19: A retrospective study in a single center in Wuhan, China. *J Med*

- Virol.* April 2020:jmv.25793. doi:10.1002/jmv.25793
11. Colombi D, Bodini FC, Petrini M, et al. Well-aerated Lung on Admitting Chest CT to Predict Adverse Outcome in COVID-19 Pneumonia. *Radiology.* 2020:201433. doi:10.1148/radiol.2020201433
  12. Deng Q, Hu B, Zhang Y, et al. Suspected myocardial injury in patients with COVID-19: Evidence from front-line clinical observation in Wuhan, China. *Int J Cardiol.* April 2020. doi:10.1016/j.ijcard.2020.03.087
  13. Du R-H, Liang L-R, Yang C-Q, et al. Predictors of Mortality for Patients with COVID-19 Pneumonia Caused by SARS-CoV-2: A Prospective Cohort Study. *Eur Respir J.* April 2020. doi:10.1183/13993003.00524-2020
  14. Du R-H, Liu L-M, Yin W, et al. Hospitalization and Critical Care of 109 Decedents with COVID-19 Pneumonia in Wuhan, China. *Ann Am Thorac Soc.* April 2020. doi:10.1513/AnnalsATS.202003-225OC
  15. Fan BE, Chong VCL, Chan SSW, et al. Hematologic parameters in patients with COVID-19 infection. *Am J Hematol.* March 2020. doi:10.1002/ajh.25774
  16. Fang X, Mei Q, Yang T, et al. Low-dose corticosteroid therapy does not delay viral clearance in patients with COVID-19. *J Infect.* April 2020. doi:10.1016/j.jinf.2020.03.039
  17. Feng Y, Ling Y, Bai T, et al. COVID-19 with Different Severity: A Multi-center Study of Clinical Features. *Am J Respir Crit Care Med.* April 2020. doi:10.1164/rccm.202002-0445OC
  18. Gao Y, Li T, Han M, et al. Diagnostic utility of clinical laboratory data determinations for patients with the severe COVID-19. *J Med Virol.* March 2020. doi:10.1002/jmv.25770
  19. Gao L, Jiang D, Wen X, et al. Prognostic value of NT-proBNP in patients with severe COVID-19. *Respir Res.* 2020;21(1):83. doi:10.1186/s12931-020-01352-w
  20. Gong J, Ou J, Qiu X, et al. A Tool to Early Predict Severe Corona Virus Disease 2019 (COVID-19) : A Multicenter Study using the Risk Nomogram in Wuhan and Guangdong, China. *Clin Infect Dis.* April 2020.

- doi:10.1093/cid/ciaa443
21. Goyal P, Choi JJ, Pinheiro LC, et al. Clinical Characteristics of Covid-19 in New York City. *N Engl J Med*. April 2020. doi:10.1056/NEJMc2010419
  22. Guan W, Ni Z, Hu Y, et al. Clinical Characteristics of Coronavirus Disease 2019 in China. *N Engl J Med*. 2020;382(18):1708-1720. doi:10.1056/NEJMoa2002032
  23. Guan W, Liang W, Zhao Y, et al. Comorbidity and its impact on 1590 patients with Covid-19 in China: A Nationwide Analysis. *Eur Respir J*. March 2020:2000547. doi:10.1183/13993003.00547-2020
  24. Guo W, Li M, Dong Y, et al. Diabetes is a risk factor for the progression and prognosis of COVID-19. *Diabetes Metab Res Rev*. March 2020:e3319. doi:10.1002/dmrr.3319
  25. Guo T, Fan Y, Chen M, et al. Cardiovascular Implications of Fatal Outcomes of Patients With Coronavirus Disease 2019 (COVID-19). *JAMA Cardiol*. March 2020. doi:10.1001/jamacardio.2020.1017
  26. Han H, Xie L, Liu R, et al. Analysis of heart injury laboratory parameters in 273 COVID-19 patients in one hospital in Wuhan, China. *J Med Virol*. April 2020. doi:10.1002/jmv.25809
  27. Huang C, Wang Y, Li X, et al. Clinical features of patients infected with 2019 novel coronavirus in Wuhan, China. *Lancet (London, England)*. 2020;395(10223):497-506. doi:10.1016/S0140-6736(20)30183-5
  28. Ji D, Qin E, Xu J, et al. Non-alcoholic fatty liver diseases in patients with COVID-19: A retrospective study. *J Hepatol*. April 2020. doi:10.1016/j.jhep.2020.03.044
  29. Ji D, Zhang D, Xu J, et al. Prediction for Progression Risk in Patients with COVID-19 Pneumonia: the CALL Score. *Clin Infect Dis*. April 2020. doi:10.1093/cid/ciaa414
  30. Jin X, Lian J-S, Hu J-H, et al. Epidemiological, clinical and virological characteristics of 74 cases of coronavirus-infected disease 2019 (COVID-19) with gastrointestinal symptoms. *Gut*. March 2020. doi:10.1136/gutjnl-2020-

31. To KK-W, Tsang OT-Y, Leung W-S, et al. Temporal profiles of viral load in posterior oropharyngeal saliva samples and serum antibody responses during infection by SARS-CoV-2: an observational cohort study. *Lancet Infect Dis.* 2020;20(5):565-574. doi:10.1016/S1473-3099(20)30196-1
32. Li H, Xiang X, Ren H, et al. Serum Amyloid A is a biomarker of severe Coronavirus Disease and poor prognosis. *J Infect.* April 2020. doi:10.1016/j.jinf.2020.03.035
33. Li Y, Peng S, Li L, et al. Clinical and Transmission Characteristics of Covid-19 — A Retrospective Study of 25 Cases from a Single Thoracic Surgery Department. *Curr Med Sci.* 2020;40(2):295-300. doi:10.1007/s11596-020-2176-2
34. Li K, Wu J, Wu F, et al. The Clinical and Chest CT Features Associated With Severe and Critical COVID-19 Pneumonia. *Invest Radiol.* 2020;55(6):327-331. doi:10.1097/RLI.0000000000000672
35. Li X, Xu S, Yu M, et al. Risk factors for severity and mortality in adult COVID-19 inpatients in Wuhan. *J Allergy Clin Immunol.* April 2020. doi:10.1016/j.jaci.2020.04.006
36. Li R, Tian J, Yang F, et al. Clinical characteristics of 225 patients with COVID-19 in a tertiary Hospital near Wuhan, China. *J Clin Virol.* 2020;127:104363. doi:10.1016/j.jcv.2020.104363
37. Lian J, Jin X, Hao S, et al. Analysis of Epidemiological and Clinical Features in Older Patients With Coronavirus Disease 2019 (COVID-19) Outside Wuhan. *Clin Infect Dis.* March 2020. doi:10.1093/cid/ciaa242
38. Lighter J, Phillips M, Hochman S, et al. Obesity in patients younger than 60 years is a risk factor for Covid-19 hospital admission. *Clin Infect Dis.* April 2020. doi:10.1093/cid/ciaa415
39. Liu K-C, Xu P, Lv W-F, et al. CT manifestations of coronavirus disease-2019: A retrospective analysis of 73 cases by disease severity. *Eur J Radiol.* 2020;126:108941. doi:10.1016/j.ejrad.2020.108941

40. Liu W, Tao Z-W, Wang L, et al. Analysis of factors associated with disease outcomes in hospitalized patients with 2019 novel coronavirus disease. *Chin Med J (Engl)*. 2020;133(9):1032-1038. doi:10.1097/CM9.0000000000000775
41. Liu Y, Du X, Chen J, et al. Neutrophil-to-lymphocyte ratio as an independent risk factor for mortality in hospitalized patients with COVID-19. *J Infect*. April 2020. doi:10.1016/j.jinf.2020.04.002
42. Liu Y, Sun W, Guo Y, et al. Association between platelet parameters and mortality in coronavirus disease 2019: Retrospective cohort study. *Platelets*. April 2020:1-7. doi:10.1080/09537104.2020.1754383
43. Liu R, Ma Q, Han H, et al. The value of urine biochemical parameters in the prediction of the severity of coronavirus disease 2019. *Clin Chem Lab Med*. April 2020. doi:10.1515/cclm-2020-0220
44. Lyu P, Liu X, Zhang R, Shi L, Gao J. The performance of chest CT in evaluating the clinical severity of COVID-19 pneumonia. *Invest Radiol*. April 2020:1. doi:10.1097/RLI.0000000000000689
45. Mao L, Jin H, Wang M, et al. Neurologic Manifestations of Hospitalized Patients With Coronavirus Disease 2019 in Wuhan, China. *JAMA Neurol*. April 2020. doi:10.1001/jamaneurol.2020.1127
46. Meng H, Xiong R, He R, et al. CT imaging and clinical course of asymptomatic cases with COVID-19 pneumonia at admission in Wuhan, China. *J Infect*. April 2020. doi:10.1016/j.jinf.2020.04.004
47. Mo P, Xing Y, Xiao Y, et al. Clinical characteristics of refractory COVID-19 pneumonia in Wuhan, China. *Clin Infect Dis*. March 2020. doi:10.1093/cid/ciaa270
48. Nobel YR, Phipps M, Zucker J, et al. Gastrointestinal Symptoms and COVID-19: Case-Control Study from the United States. *Gastroenterology*. April 2020. doi:10.1053/j.gastro.2020.04.017
49. Pan L, Mu M, Yang P, et al. Clinical Characteristics of COVID-19 Patients With Digestive Symptoms in Hubei, China. *Am J Gastroenterol*. 2020;115(5):766-773. doi:10.14309/ajg.0000000000000620

50. Qin C, Zhou L, Hu Z, et al. Dysregulation of immune response in patients with COVID-19 in Wuhan, China. *Clin Infect Dis*. March 2020. doi:10.1093/cid/ciaa248
51. Qiu H, Wu J, Hong L, Luo Y, Song Q, Chen D. Clinical and epidemiological features of 36 children with coronavirus disease 2019 (COVID-19) in Zhejiang, China: an observational cohort study. *Lancet Infect Dis*. March 2020. doi:10.1016/S1473-3099(20)30198-5
52. Shen L, Li S, Zhu Y, et al. Clinical and laboratory-derived parameters of 119 hospitalized patients with coronavirus disease 2019 in Xiangyang, Hubei Province, China. *J Infect*. April 2020. doi:10.1016/j.jinf.2020.03.038
53. Shen C, Yu N, Cai S, et al. Quantitative computed tomography analysis for stratifying the severity of Coronavirus Disease 2019. *J Pharm Anal*. 2020;10(2):123-129. doi:10.1016/j.jpha.2020.03.004
54. Shi Y, Yu X, Zhao H, Wang H, Zhao R, Sheng J. Host susceptibility to severe COVID-19 and establishment of a host risk score: findings of 487 cases outside Wuhan. *Crit Care*. 2020;24(1):108. doi:10.1186/s13054-020-2833-7
55. Shi S, Qin M, Shen B, et al. Association of Cardiac Injury With Mortality in Hospitalized Patients With COVID-19 in Wuhan, China. *JAMA Cardiol*. March 2020. doi:10.1001/jamacardio.2020.0950
56. Simonnet A, Chetboun M, Poissy J, et al. High prevalence of obesity in severe acute respiratory syndrome coronavirus-2 (SARS-CoV-2) requiring invasive mechanical ventilation. *Obesity (Silver Spring)*. April 2020. doi:10.1002/oby.22831
57. Tang N, Bai H, Chen X, Gong J, Li D, Sun Z. Anticoagulant treatment is associated with decreased mortality in severe coronavirus disease 2019 patients with coagulopathy. *J Thromb Haemost*. 2020;18(5):1094-1099. doi:10.1111/jth.14817
58. Tian S, Hu N, Lou J, et al. Characteristics of COVID-19 infection in Beijing. *J Infect*. 2020;80(4):401-406. doi:10.1016/j.jinf.2020.02.018
59. Wan S, Xiang Y, Fang W, et al. Clinical features and treatment of COVID-19

- patients in northeast Chongqing. *J Med Virol*. March 2020.  
doi:10.1002/jmv.25783
60. Wang Y, Lu X, Chen H, et al. Clinical Course and Outcomes of 344 Intensive Care Patients with COVID-19. *Am J Respir Crit Care Med*. April 2020.  
doi:10.1164/rccm.202003-0736LE
  61. Wang L, He W, Yu X, et al. Coronavirus disease 2019 in elderly patients: Characteristics and prognostic factors based on 4-week follow-up. *J Infect*. March 2020. doi:10.1016/j.jinf.2020.03.019
  62. Wang Y, Liu Y, Liu L, Wang X, Luo N, Li L. Clinical Outcomes in 55 Patients With Severe Acute Respiratory Syndrome Coronavirus 2 Who Were Asymptomatic at Hospital Admission in Shenzhen, China. *J Infect Dis*. March 2020. doi:10.1093/infdis/jiaa119
  63. Wang Z, Yang B, Li Q, Wen L, Zhang R. Clinical Features of 69 Cases with Coronavirus Disease 2019 in Wuhan, China. *Clin Infect Dis*. March 2020.  
doi:10.1093/cid/ciaa272
  64. Wang D, Hu B, Hu C, et al. Clinical Characteristics of 138 Hospitalized Patients With 2019 Novel Coronavirus-Infected Pneumonia in Wuhan, China. *JAMA*. February 2020. doi:10.1001/jama.2020.1585
  65. Wang L, Li X, Chen H, et al. Coronavirus Disease 19 Infection Does Not Result in Acute Kidney Injury: An Analysis of 116 Hospitalized Patients from Wuhan, China. *Am J Nephrol*. March 2020:1-6. doi:10.1159/000507471
  66. Wu J, Li W, Shi X, et al. Early antiviral treatment contributes to alleviate the severity and improve the prognosis of patients with novel coronavirus disease (COVID-19). *J Intern Med*. March 2020. doi:10.1111/joim.13063
  67. Wu C, Chen X, Cai Y, et al. Risk Factors Associated With Acute Respiratory Distress Syndrome and Death in Patients With Coronavirus Disease 2019 Pneumonia in Wuhan, China. *JAMA Intern Med*. March 2020.  
doi:10.1001/jamainternmed.2020.0994
  68. Xie H, Zhao J, Lian N, Lin S, Xie Q, Zhuo H. Clinical characteristics of non-ICU hospitalized patients with coronavirus disease 2019 and liver injury: A

- retrospective study. *Liver Int.* April 2020. doi:10.1111/liv.14449
69. Xu Y-H, Dong J-H, An W-M, et al. Clinical and computed tomographic imaging features of novel coronavirus pneumonia caused by SARS-CoV-2. *J Infect.* 2020;80(4):394-400. doi:10.1016/j.jinf.2020.02.017
  70. Yang Z, Shi J, He Z, et al. Predictors for imaging progression on chest CT from coronavirus disease 2019 (COVID-19) patients. *Aging (Albany NY).* 2020;12(7):6037-6048. doi:10.18632/aging.102999
  71. Yang X, Yu Y, Xu J, et al. Clinical course and outcomes of critically ill patients with SARS-CoV-2 pneumonia in Wuhan, China: a single-centered, retrospective, observational study. *Lancet Respir Med.* February 2020. doi:10.1016/S2213-2600(20)30079-5
  72. Yang X, Yang Q, Wang Y, et al. Thrombocytopenia and its association with mortality in patients with COVID-19. *J Thromb Haemost.* May 2020. doi:10.1111/jth.14848
  73. Yang A-P, Liu J, Tao W, Li H. The diagnostic and predictive role of NLR, d-NLR and PLR in COVID-19 patients. *Int Immunopharmacol.* 2020;84:106504. doi:10.1016/j.intimp.2020.106504
  74. Young BE, Ong SWX, Kalimuddin S, et al. Epidemiologic Features and Clinical Course of Patients Infected With SARS-CoV-2 in Singapore. *JAMA.* March 2020. doi:10.1001/jama.2020.3204
  75. Yuan J, Zou R, Zeng L, et al. The correlation between viral clearance and biochemical outcomes of 94 COVID-19 infected discharged patients. *Inflamm Res.* 2020;69(6):599-606. doi:10.1007/s00011-020-01342-0
  76. Yuan M, Yin W, Tao Z, Tan W, Hu Y. Association of radiologic findings with mortality of patients infected with 2019 novel coronavirus in Wuhan, China. *PLoS One.* 2020;15(3):e0230548. doi:10.1371/journal.pone.0230548
  77. Zhao W, Zhong Z, Xie X, Yu Q, Liu J. CT Scans of Patients with 2019 Novel Coronavirus (COVID-19) Pneumonia. *Theranostics.* 2020;10(10):4606-4613. doi:10.7150/thno.45016
  78. Zhang G, Zhang J, Wang B, Zhu X, Wang Q, Qiu S. Analysis of clinical

- characteristics and laboratory findings of 95 cases of 2019 novel coronavirus pneumonia in Wuhan, China: a retrospective analysis. *Respir Res.* 2020;21(1):74. doi:10.1186/s12931-020-01338-8
79. Zhang Y, Zheng L, Liu L, Zhao M, Xiao J, Zhao Q. Liver impairment in COVID-19 patients: A retrospective analysis of 115 cases from a single centre in Wuhan city, China. *Liver Int.* April 2020. doi:10.1111/liv.14455
  80. Zhang J-J, Dong X, Cao Y-Y, et al. Clinical characteristics of 140 patients infected with SARS-CoV-2 in Wuhan, China. *Allergy.* February 2020. doi:10.1111/all.14238
  81. Zhang X, Cai H, Hu J, et al. Epidemiological, clinical characteristics of cases of SARS-CoV-2 infection with abnormal imaging findings. *Int J Infect Dis.* 2020;94:81-87. doi:10.1016/j.ijid.2020.03.040
  82. Zhang J, Wang X, Jia X, et al. Risk factors for disease severity, unimprovement, and mortality in COVID-19 patients in Wuhan, China. *Clin Microbiol Infect.* April 2020. doi:10.1016/j.cmi.2020.04.012
  83. Zhang R, Ouyang H, Fu L, et al. CT features of SARS-CoV-2 pneumonia according to clinical presentation: a retrospective analysis of 120 consecutive patients from Wuhan city. *Eur Radiol.* April 2020. doi:10.1007/s00330-020-06854-1
  84. Zhao W, Zhong Z, Xie X, Yu Q, Liu J. Relation Between Chest CT Findings and Clinical Conditions of Coronavirus Disease (COVID-19) Pneumonia: A Multicenter Study. *AJR Am J Roentgenol.* 2020;214(5):1072-1077. doi:10.2214/AJR.20.22976
  85. Zheng F, Tang W, Li H, Huang Y-X, Xie Y-L, Zhou Z-G. Clinical characteristics of 161 cases of corona virus disease 2019 (COVID-19) in Changsha. *Eur Rev Med Pharmacol Sci.* 2020;24(6):3404-3410. doi:10.26355/eurrev\_202003\_20711
  86. Zhou Y, Zhang Z, Tian J, Xiong S. Risk factors associated with disease progression in a cohort of patients infected with the 2019 novel coronavirus. *Ann Palliat Med.* 2020;9(2):428-436. doi:10.21037/apm.2020.03.26

87. Zhou F, Yu T, Du R, et al. Clinical course and risk factors for mortality of adult inpatients with COVID-19 in Wuhan, China: a retrospective cohort study. *Lancet (London, England)*. 2020;395(10229):1054-1062. doi:10.1016/S0140-6736(20)30566-3
88. Zhou Z, Zhao N, Shu Y, Han S, Chen B, Shu X. Effect of Gastrointestinal Symptoms on Patients Infected With Coronavirus Disease 2019. *Gastroenterology*. March 2020. doi:10.1053/j.gastro.2020.03.020
